# Supplementary material for: Effect of Collaborative Care on Persistent Postconcussive Symptoms in Adolescents: A Randomized Clinical Trial
Source: PubMed Central journal article supplement (PMC7910815; doi:10.1001/jamanetworkopen.2021.0207), 2021-02-26
Supplement: jamanetwopen-e210207-s002.pdf [file jamanetwopen-e210207-s002.pdf]

## Supplemental Online Content

McCarty CA, Zatzick DF, Marcynyszyn LA, et al. Effect of collaborative care on persistent postconcussive symptoms in adolescents: a randomized clinical trial. *JAMA Netw Open*. 2021;4(2):e210207. doi:10.1001/jamanetworkopen.2021.0207

**eTable 1.** Proportion of Adolescents Using Healthcare Services in the Collaborative Care and Usual Care Groups Across Time

**eTable 2.** Proportion of Adolescents Receiving SSRIs and Tricyclic Antidepressants in the Collaborative Care and Usual Care Groups Across Time

**eTable 3.** Health Related Quality of Life Subscales in the Collaborative Care and Usual Care Groups Across Time, Mean (SD)

**eTable 4.** Sleep Quality Differences in the Collaborative Care and Usual Care Groups Across Time, Mean (SD)

**eFigure 1.** Post-Concussive Symptoms (HBI) in the Collaborative Care and Usual Care Groups by Parent Report

**eFigure 2.** Health-Related Quality of Life (Peds-QL) in the Collaborative Care and Usual Care Groups by Parent Report

**eFigure 3.** Proportion of Adolescents Indicating Suicidal Ideation in the Collaborative Care and Usual Care Groups Across Time

This supplemental material has been provided by the authors to give readers additional information about their work.

**eTable 1. Proportion of Adolescents Using Healthcare Services in the Collaborative Care and Usual Care Groups Across Time<sup>a</sup>**

|                         | Study enrollment to 3 months |           | 3 to 6 months     |                   | 6 to 12 months          |                         |
|-------------------------|------------------------------|-----------|-------------------|-------------------|-------------------------|-------------------------|
|                         | UC (n=98)                    | CC (n=99) | UC (n=96)         | CC (n=98)         | UC (n=93 <sup>a</sup> ) | CC (n=98 <sup>a</sup> ) |
| Mental health care      | 40.8                         | 47.5      | 43.8 <sup>b</sup> | 58.2 <sup>b</sup> | 45.2                    | 48.0                    |
| Primary care            | 66.3                         | 62.6      | 68.8              | 55.1              | 72.0                    | 69.4                    |
| Sports medicine         | 55.1                         | 55.6      | 42.7              | 40.8              | 29.0                    | 30.6                    |
| Rehabilitation medicine | 28.6                         | 31.2      | 18.8              | 14.3              | 11.8                    | 9.2                     |
| Other healthcare visit  | 37.8                         | 37.4      | 33.3              | 30.6              | 24.7                    | 34.7                    |

Abbreviations: CC, Collaborative Care; UC, Usual Care.

Group by time interactions adjusted for gender, age, and time elapsed since the concussion injury event.

Healthcare services are based on parent report.

<sup>a</sup>One parent from each group did not complete the healthcare utilization survey at 12 months.

<sup>b</sup>Adjusted risk ratio for CC vs. UC mental health care differences at 3 to 6 months relative to baseline = 1.80 (95% CI: 1.13 to 2.85).

**eTable 2. Proportion of Adolescents Receiving SSRIs and Tricyclic Antidepressants in the Collaborative Care and Usual Care Groups Across Time**

|                           | 3 months prior to study enrollment |            | Study enrollment to 3 months |           | 3 to 6 months |           | 6 to 12 months          |                         |
|---------------------------|------------------------------------|------------|------------------------------|-----------|---------------|-----------|-------------------------|-------------------------|
|                           | UC (n=99)                          | CC (n=101) | UC (n=98)                    | CC (n=99) | UC (n=96)     | CC (n=98) | UC (n=93 <sup>a</sup> ) | CC (n=98 <sup>a</sup> ) |
| SSRIs                     | 7.1                                | 7.9        | 13.3                         | 16.2      | 18.8          | 17.4      | 22.3                    | 20.2                    |
| Tricyclic antidepressants | 3.0                                | 2.0        | 7.1                          | 5.1       | 6.3           | 2.0       | 2.1                     | 4.0                     |

Abbreviations: CC, Collaborative Care; SSRIs, selective serotonin reuptake inhibitors; UC, Usual Care.

Medication use is based on parent report.

All differences are nonsignificant ( $P > 0.05$ ).

<sup>a</sup>One parent from each group did not complete the survey about medication use at 12 months.

**eTable 3. Health Related Quality of Life Subscales in the Collaborative Care and Usual Care Groups Across Time, Mean (SD)**

|             | Baseline     |               | 3 month      |              | 6 month                 |                         | 12 month                |                         |
|-------------|--------------|---------------|--------------|--------------|-------------------------|-------------------------|-------------------------|-------------------------|
|             | UC<br>(n=99) | CC<br>(n=101) | UC<br>(n=98) | CC<br>(n=98) | UC<br>(n=95)            | CC<br>(n=99)            | UC<br>(n=95)            | CC<br>(n=99)            |
| Physical    | 66.7(19.4)   | 68.1(19.8)    | 82.9(15.3)   | 83.3(18.6)   | 84.9(14.9)              | 85.5(19.3)              | 84.9(15.8)              | 88.5(16.4)              |
| Emotional   | 66.8(20.3)   | 67.7(21.3)    | 73.2(22.3)   | 78.1(21.1)   | 74.4(22.4) <sup>a</sup> | 81.4(20.9) <sup>a</sup> | 71.9(24.5) <sup>a</sup> | 81.4(21.4) <sup>a</sup> |
| Social      | 85.1(14.9)   | 81.8(18.4)    | 86.4(15.6)   | 85.1(17.6)   | 88.7(14.3)              | 88.2(16.6)              | 88.7(15.7) <sup>a</sup> | 90.2(15.7) <sup>a</sup> |
| School      | 47.7(24.2)   | 48.5(22.0)    | 66.2(22.8)   | 68.5(26.6)   | 70.1(22.4)              | 74.3(23.4)              | 69.2(20.7)              | 73.4(24.2)              |
| Total score | 66.6(15.2)   | 66.5(15.5)    | 77.2(15.2)   | 78.7(17.9)   | 79.5(15.5)              | 82.3(17.4)              | 78.7(16.1) <sup>a</sup> | 83.4(16.6) <sup>a</sup> |

Abbreviations: CC, Collaborative Care; UC, Usual Care.

All subscales are from the Pediatric Quality of Life Inventory, based on adolescent report.

Subscales are scored from 0-100, with higher scores indicating better quality of life.

<sup>a</sup> Differences from baseline between groups are statistically significant ( $P < 0.05$ ).

**eTable 4. Sleep Quality Differences in the Collaborative Care and Usual Care Groups Across Time, Mean (SD)**

|                                   | Baseline     |               | 3 month               |                       | 6 month               |                       | 12 month              |                       |
|-----------------------------------|--------------|---------------|-----------------------|-----------------------|-----------------------|-----------------------|-----------------------|-----------------------|
|                                   | UC<br>(n=99) | CC<br>(n=101) | UC<br>(n=98)          | CC<br>(n=98)          | UC<br>(n=95)          | CC<br>(n=99)          | UC<br>(n=95)          | CC<br>(n=99)          |
| Going to bed                      | 3.9(1.2)     | 3.8(1.0)      | 3.7(1.1) <sup>a</sup> | 4.1(1.1) <sup>a</sup> | 3.9(1.2)              | 4.0(1.1)              | 3.8(1.2) <sup>a</sup> | 4.2(1.1) <sup>a</sup> |
| Falling asleep/reinitiating sleep | 4.5(1.1)     | 4.3(1.0)      | 4.5(1.1) <sup>a</sup> | 4.7(1.1) <sup>a</sup> | 4.6(1.2)              | 4.7(1.1)              | 4.6(1.1) <sup>a</sup> | 4.8(1.2) <sup>a</sup> |
| Return to wakefulness             | 2.4(1.1)     | 2.5(1.1)      | 2.6(1.2) <sup>a</sup> | 3.1(1.3) <sup>a</sup> | 2.7(1.2)              | 3.0(1.3)              | 2.7(1.3) <sup>a</sup> | 3.2(1.4) <sup>a</sup> |
| Overall total                     | 3.9(0.9)     | 3.8(0.8)      | 3.9(0.8) <sup>a</sup> | 4.2(0.9) <sup>a</sup> | 4.0(1.0) <sup>a</sup> | 4.2(0.9) <sup>a</sup> | 4.0(0.9) <sup>a</sup> | 4.3(0.9) <sup>a</sup> |

Abbreviations: CC, Collaborative Care; UC, Usual Care.

All scales are from the Adolescent Sleep-Wake Scale—Short Form, based on adolescent report.

Scales are scored on a 1-6 Likert scale, with higher scores indicating better sleep quality.

<sup>a</sup> Differences from baseline between groups are statistically significant ( $P < 0.05$ ).

**eFigure 1. Post-Concussive Symptoms (HBI) in the Collaborative Care and Usual Care Groups by Parent Report**

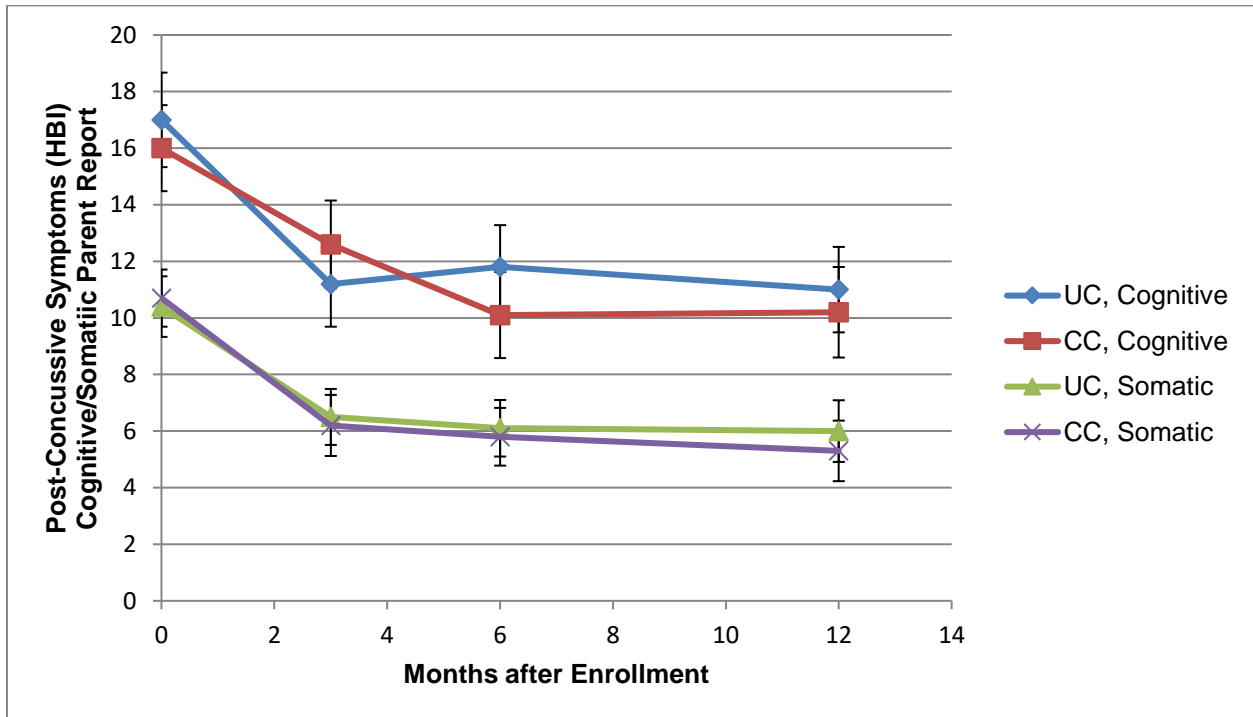

Abbreviations: CC, collaborative care; HBI, Health Behavior Inventory; UC, usual care.  
Means adjusted for gender, age, and time elapsed since the concussion injury event.

**eFigure 2. Health-Related Quality of Life (Peds-QL) in the Collaborative Care and Usual Care Groups by Parent Report**

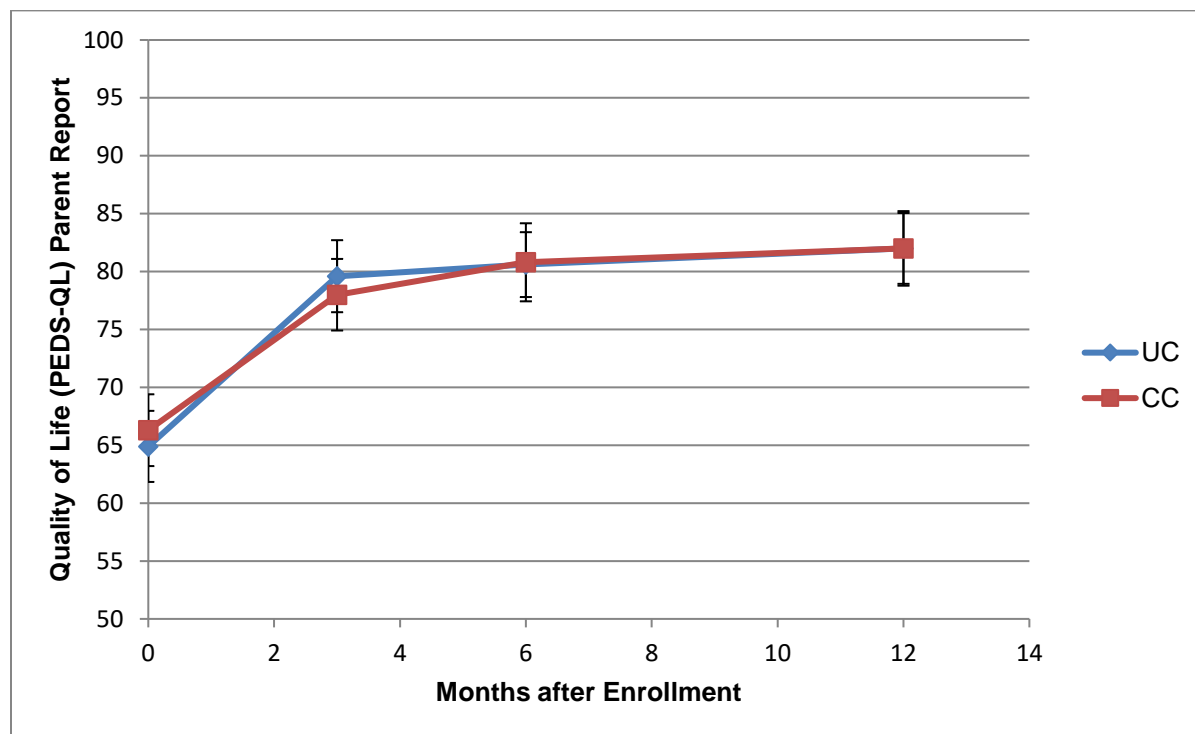

Abbreviation: CC, collaborative care; PedsQL, Pediatric Quality of Life Inventory; UC, usual care. Means adjusted for gender, age, and time elapsed since the concussion injury event.

**eFigure 3. Proportion of Adolescents Indicating Suicidal Ideation in the Collaborative Care and Usual Care Groups Across Time<sup>a</sup>**

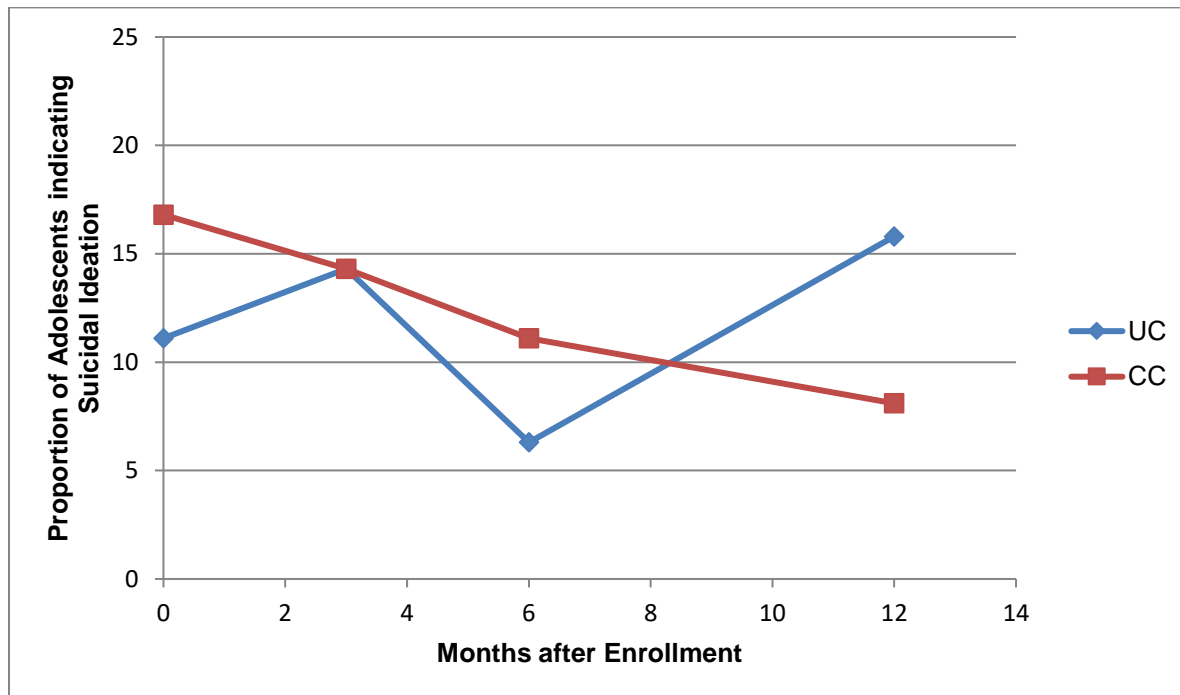

Abbreviations: CC, Collaborative Care; UC, Usual Care.

Patient Health Questionnaire-9 scores ( $\geq 1$ ) on the 9<sup>th</sup> item were used as an indicator of suicidal ideation.

<sup>a</sup> Proportions presented are unadjusted.
