# Supplementary material for: Effect of Collaborative Care on Persistent Postconcussive Symptoms in Adolescents: A Randomized Clinical Trial
Source: PubMed Central journal article supplement (PMC7910815; doi:10.1001/jamanetworkopen.2021.0207), 2021-02-26
Supplement: jamanetwopen-e210207-s003.pdf [file jamanetwopen-e210207-s003.pdf]

## **Data Sharing Statement**

McCarty. Effect of Collaborative Care on Persistent Postconcussive Symptoms in Adolescents. *JAMA Netw Open*. Published February 26, 2021. doi:10.1001/jamanetworkopen.2021.0207

### **Data**

**Data available:** No
